# Supplementary material for: Effects of Helicobacter pylori infection on T cell activation markers and regulatory T cells in people with and without HIV infection in Central Ethiopia
Source: Research Square preprint supplement (doi:10.21203/rs.3.rs-7058889/v1), 2025-07-23
Supplement: Supplementary file 1 [file 38399aed692bcb57ee3494ea.docx]

**
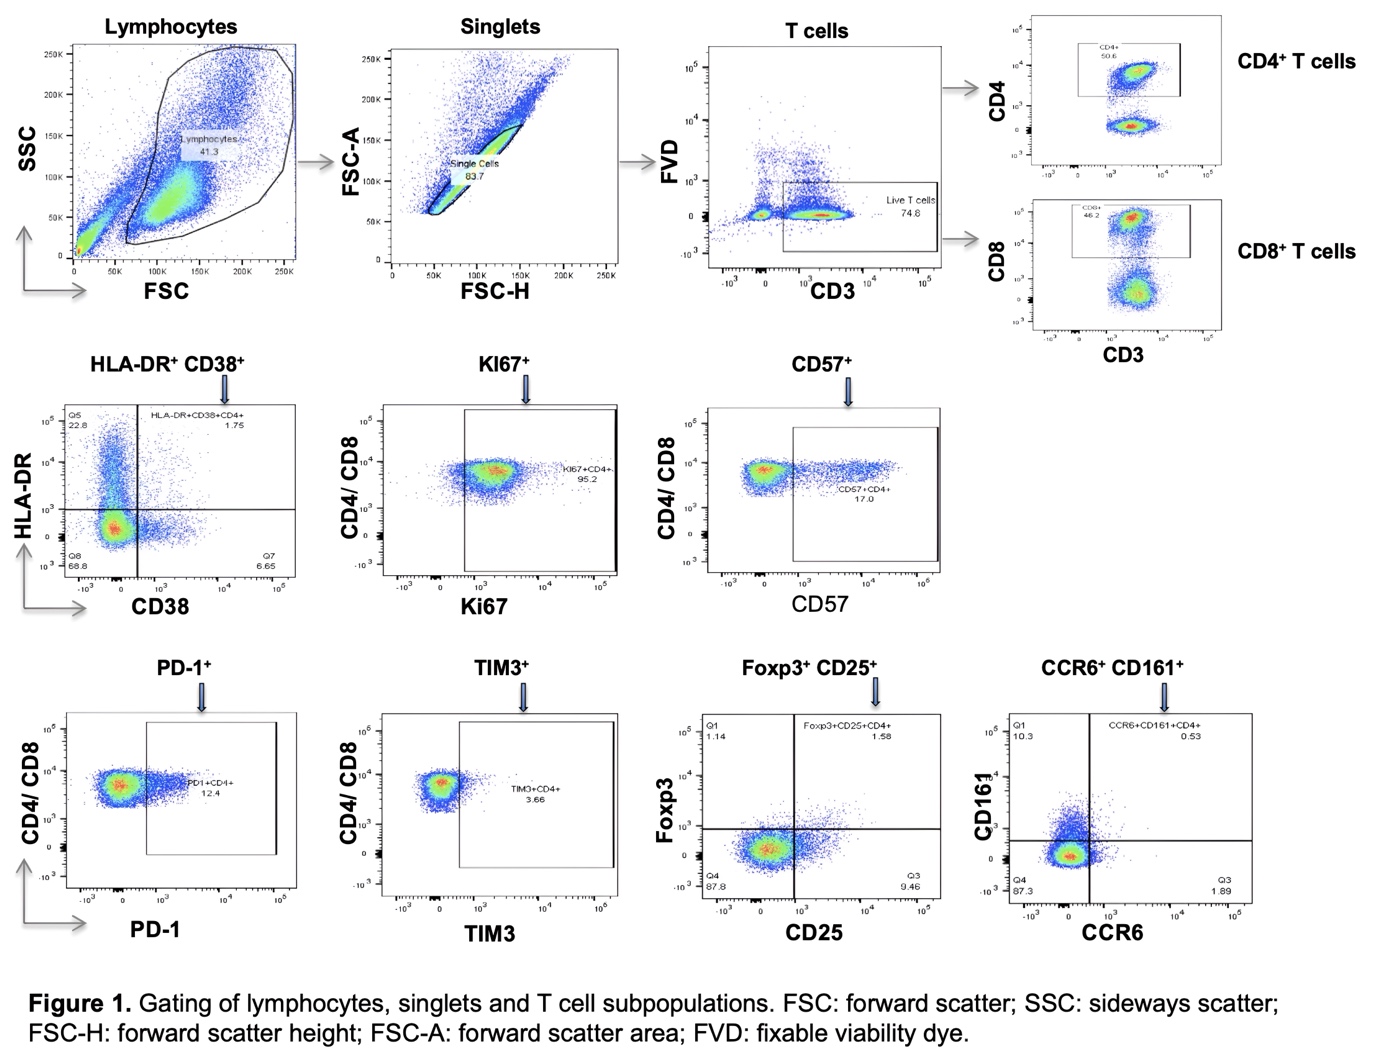
**

**Supplementary Fig. 1.** Gating of lymphocytes, singlets and T cell subpopulations. FSC: forward scatter; SSC: sideways scatter; FSC-H: forward scatter height; FSC-A: forward scatter area; FVD: fixable viability dye.
