# Supplementary material for: Effects of Helicobacter pylori infection on T cell activation markers and regulatory T cells in people with and without HIV infection in Central Ethiopia
Source: Research Square preprint supplement (doi:10.21203/rs.3.rs-7058889/v1), 2025-07-23
Supplement: Supplementary file 2 [file 69a3360277f8945fe80252ce.docx]

Supplementary Table 1. Panels for flow cytometry analysis

| **Channel** | **Panel 1**  **(activated T cells)** | **Panel 2**  **(T cell exhaustion)** | **Panel 3**  **(Tregs)** | **Panel 4**  **(Th17)** |
| --- | --- | --- | --- | --- |
| eFluor 450 | CD4 | CD4 | CD4 | CD4 |
| eFluor 506 | CD3 | CD3 | CD3 | CD3 |
| eFluor 520  (FITC equiv.) | FVD | FVD | FVD | FVD |
| PE | HLA-DR | TIM3 | CD25 | CCR6 |
| PerPE-Cy5.5 | CD8 | CD8 | Foxp3 | CD161 |
| PE-Cy7 | Ki67 | PD-1 | PD-1 | PD-1 |
| eFluor 660 | CD69 | CD57 | CD127 | CD69 |
| APC- eFluor 780 | CD38 | CD38 | CD38 | CD38 |

*FITC: fluorescein isothiocyanate; PE: phycoerythrin; PerCP: peridinin-chlorophyll-protein complex; Cy: cyanin; APC: allophycocyanin; CD: cluster of differentiation; FVD: fixable viability dye; TIM3: T-cell immunoglobulin and mucin-domain containing-3; Foxp3: forkhead box protein 3; PD-1: programmed death 1*
